# Supplementary material for: Multiple Factors Determine the Oncolytic or Carcinogenic Effects of TLRs Activation in Cancer
Source: Hindawi journal article supplement (doi:10.1155/2024/1111551), 2024-01-01
Supplement: f1 [file 1111551.f1.docx]

**Appendix Table 1** Registered clinical trials with TLR agonist/antagonist in cancer treatment (From <https://clinicaltrials.gov/> as of July 2023)

| No. | TLR | Agonist/antagonist | Cancer type | Intervention | Phase | Outcome | Trial No. |
| --- | --- | --- | --- | --- | --- | --- | --- |
| 1 | TLR1/2 | XS15 | Advanced solid and hematological malignancies | Personalized multi-peptide vaccine, XS15 | Expanded access | Not completed | NCT05014607 |
| 2 | TLR1/2 | XS15 | Chronic lymphocytic leukemia | Multipeptide Vaccine, XS15 | 1 | Not completed | NCT04688385 |
| 3 | TLR2 | CBLB612 | Breast cancer | CBLB612 | 2 | N/A | NCT02778763 |
| 4 | TLR2 | Amplivant | HPV16 (+) tumors or premalignant lesions | Hespecta (HPV E6 peptide conjugated to Amplivant) | 1 | Mild adverse events, strong systemic T cell immunity | NCT02821494 |
| 5 | TLR2, TLR4 | OM-174 | Solid tumors | OM-174 | 1 | 3/17 SD, well tolerated | NCT01800812 |
| 6 | TLR2 | TIR domain of TLR2 as part of chimeric antigen | B-cell non-Hodgkin lymphoma | WZTL002-1 (1928T2z CAR-T cells) | 1 | Not completed | NCT04049513 |
| 7 | TLR3 | Poly-ICLC | Advanced, measurable, biopsy-accessible cancers | Durvalumab, Tremelimumab, Poly-ICLC | 1/2 | 0/37 CR, 3/37 PR, 6/37 SD, 28/37 PD | NCT02643303 |
| 8 | TLR3 | Poly-ICLC | Metastatic colon cancer | Pembrolizumab, Poly-ICLC | 1/2 | N/A | NCT02834052 |
| 9 | TLR3 | Poly-ICLC | Hepatocellular carcinoma | Poly-ICLC | 1 | Not completed | NCT05281926 |
| 10 | TLR3 | Poly-ICLC | Melanoma | NY-ESO-1 protein, Poly-ICLC, Montanide | 1/2 | 9/9 CD4 response, 4/9 CD8 response | NCT01079741 |
| 11 | TLR3 | Poly-ICLC | Glioblastoma, Glioma | Bevacizumab, peptide vaccine, Poly-ICLC, Keyhole limpet hemocyanin | 2 | Withdrawn (personnel changes) | NCT02754362 |
| 12 | TLR3 | Poly-ICLC | Cutaneous T-cell lymphoma | Romidepsin, radiation, poly-ICLC | 1 | N/A | NCT02061449 |
| 13 | TLR3 | Poly-ICLC | Melanoma | 6MHP, NeoAg-mBRAF, CDX-1140, poly-ICLC | 1/2 | Not completed | NCT04364230 |
| 14 | TLR3 | Poly-ICLC | Low-grade B-cell lymphoma | rhuFlt3L/CDX-301, radiotherapy, poly-ICLC | 1/2 | Target lesion: 2/11 CR, 6/11 PR, 3/11 SD;  Non-target lesion: 1/11 CR, 2/11 PR, 6/11 SD, 2/11 PD | NCT01976585 |
| 15 | TLR3 | Poly-ICLC | Non-small cell lung cancer, advanced triple negative breast cancer, small cell lung cancer, urothelial cancer, mesothelioma, malignant melanoma | Pembrolizumab, CDX-1401, poly-ICLC | 1/2 | Withdrawn (drug unavailable) | NCT02661100 |
| 16 | TLR3 | BO-112 (nanoplexed poly-I:C) | Cancer | BO-112, nivolumab or pembrolizumab | 1 | PR 3/19, SD 10/19 | NCT02828098 |
| 17 | TLR3 | BO-112 (nanoplexed poly-I:C) | Melanoma | Pembrolizumab, BO-112 | 2 | Not completed | NCT04570332 |
| 18 | TLR3 | Rintatolimod (Ampligen) | Recurrent ovarian, fallopian tube or primary peritoneal cancer | Oxidized tumor Cell Lysate (OC-L)/Montanide ISA 51 VG, Ampligen | 1/2 | Terminated (did not meet criteria laid out in Phase 1 to continue to Phase 2) | NCT01312389 |
| 19 | TLR3 | Rintatolimod (Ampligen) | Early stage triple negative breast cancer | Chemotherapy (paclitaxel, doxorubicin, cyclophosphamide), chemokine modulation (celecoxib, interferon alfa-2b, rintatolimod) | 1 | Not completed | NCT04081389 |
| 20 | TLR3, TLR4 | lipopolysaccharide (LPS), poly-ICLC | Melanoma | Vaccine MELITAC 12.1 + Montanide ISA-51 + lipopolysaccharide (LPS) or poly-ICLC | 1 | 8/33 OS, 8/33 DFS or 4/18 OS, 2/18 DFS | NCT01585350 |
| 21 | TLR3, TLR7/8 | Poly-ICLC, Resiquimod | Melanoma | Peptide vaccine (LPV7), tetanus peptide, IFA, poly-ICLC, Resiquimod | 1/2 | 43/50 OS, 32/50 DFS, 11/33 recurrences in groups with IFA-containing adjuvants, 7/17 recurrences in groups without IFA adjuvants | NCT02126579 |
| 22 | TLR7/8, TLR3 | Resiquimod, poly-ICLC | Malignant glioma | Tumor lysate-pulsed DC vaccination, resiquimod or poly-ICLC | 2 | Not completed | NCT01204684 |
| 23 | TLR4 | GSK1795091 | Healthy subjects | GSK1795091 | 1 | 0/30 SAE | NCT02798978 |
| 24 | TLR4 | Glucopyranosyl lipid A–stable-emulsion (GLA-SE, G100) | Skin melanoma | MART-1 Antigen, GLA-SE | 1 | 6/12 recurrence (MART-1 + GLA-SE) vs. 2/11 recurrence (MART-1 + SE) | NCT02320305 |
| 25 | TLR4 | Glucopyranosyl lipid A–stable-emulsion (GLA-SE, G100) | Stage III/IV adult soft tissue sarcoma | Radiation therapy, GLA-SE | 1 | N/A | NCT02180698 |
| 26 | TLR4 | Glucopyranosyl lipid A–stable-emulsion (GLA-SE, G100) | Merkel cell carcinoma | GLA-SE | 1 | N/A | NCT02035657 |
| 27 | TLR4 | Glucopyranosyl lipid A–stable-emulsion (GLA-SE, G100) | Follicular low grade non-Hodgkin's lymphoma | Radiation, G100, Pembrolizumab | 1/2 | 6/13 PR, 6/13 SD, 1/13 PD, overall response rate 33.3%, abscopal tumor regression 72.2% | NCT02501473 |
| 28 | TLR4 | Glucopyranosyl lipid A–stable-emulsion (GLA-SE, G100) | Cutaneous T cell lymphoma | Intratumoral G100 | 2 | Withdrawn (loss of company sponsorship) | NCT03742804 |
| 29 | TLR4 | Glucopyranosyl lipid A–stable-emulsion (GLA-SE, G100) | Metastatic colorectal cancer | FOLFOX regimen, Nivolumab, Ipilimumab, GLA-SE | 1 | Withdrawn (withdrawal of industrial partner) | NCT03982121 |
| 30 | TLR4 | GSK1795091 | Cancers | GSK1795091, GSK3174998, GSK3359609, Pembrolizumab | 1 | 1/9 PR (GSK1795091 + GSK3174998), 2/6 PR (GSK1795091 + pembrolizumab), 10/28 SD (GSK1795091 + GSK3174998), 2/11 SD (GSK1795091 + GSK3359609), 1/7 SD (GSK1795091 + pembrolizumab) | NCT03447314 |
| 31 | TLR4 | Constitutively active form of TLR4 | Melanoma | Autologous dendritic cell vaccine matured by three different molecular adjuvants (Trimix DC) or constitutively active form of TLR4 (TLR-DC) | 1/2 | N/A | NCT01530698 |
| 32 | TLR5 | Entolimod (CBLB502) | Advanced squamous cell carcinomas of the head and neck | Cisplatin, radiation therapy, entolimod | 1 | Withdrawn (sponsor requested for financial reasons) | NCT01728480 |
| 33 | TLR5 | Entolimod (CBLB502) | Solid tumor | Entolimod | 1 | N/A | NCT01527136 |
| 34 | TLR5 | Entolimod (CBLB502) | Colorectal cancer | CBLB502 | 2 | N/A | NCT02715882 |
| 35 | TLR5 | Mobilan (adenovirus carrying TLR5 and its agonist) | Prostate Cancer | Mobilan | 1 | Mobilan-treated and placebo-treated patients exhibited a similar decrease in the degree of cell differentiation over the course of the study. | NCT02654938 |
| 36 | TLR5 | Mobilan (adenovirus carrying TLR5 and its agonist) | Prostate Cancer | Mobilan | 1/2 | Not completed | NCT02844699 |
| 37 | TLR7 | Imiquimod | Breast cancer with chest wall recurrence or skin metastasis | Topical Imiquimod | 2 | 2/10 PD, 5/10 SD, 1/10 NR, 2/10 PD | NCT00899574 |
| 38 | TLR7 | Imiquimod | Breast cancer with skin metastasis | Radiation, cyclophosphamide, topical Imiquimod | 1/2 | Abscopal effect achieved in non-irradiated tumor | NCT01421017 |
| 39 | TLR7 | Imiquimod | Oral Cancer | Imiquimod | 1 | Not completed | NCT04883645 |
| 40 | TLR7 | Imiquimod | Vulvar intraepithelial neoplasias, anogenital warts | Imiquimod | 2 | N/A | NCT00941811 |
| 41 | TLR7 | Imiquimod | Metastatic melanoma (Skin) | Imiquimod, Laser therapy, indocyanine green | 1 | 8/11 complete local response (7/8 CR, 1/8 PD), 3/11 partial local response (2/3 PR, 1/3 SD) | NCT00453050 |
| 42 | TLR7 | DSP-0509 | Advanced solid tumors | Pembrolizumab, DSP-0509 | 1/2 | Not completed | NCT03416335 |
| 43 | TLR7 | 852A | Breast cancer, ovarian cancer, endometrial cancer, cervical cancer | 852A | 2 | 1/3 SD, 2/3 PD in patients with ovarian cancer | NCT00319748 |
| 44 | TLR7 | BNT411 | Solid tumor, Extensive-stage small cell lung cancer | BNT411, Atezolizumab, Carboplatin, Etoposide | 1/2 | Not completed | NCT04101357 |
| 45 | TLR7 | LHC165 | Solid tumors | Spartalizumab (PD,001), LHC165 | 1 | Terminated (business reasons) | NCT03301896 |
| 46 | TLR7 | SHR2150 | Unresectable/metastatic solid tumors | SHR2150, chemotherapy plus PD-1 or CD47 antibody | 1/2 | Not completed | NCT04588324 |
| 47 | TLR7 | RO7119929 | Hepatocellular carcinoma, biliary tract cancer, secondary liver cancer, liver metastases | RO7119929 | 1 | N/A | NCT04338685 |
| 48 | TLR7 | NJH395 (TLR7 agonist conjugated to anti-HER2 antibody) | Non-breast HER2+ malignancies | NJH395 | 1 | 0/17 CR, 0/17 PR, 9/17 SD, 8/17 PD | NCT03696771 |
| 49 | TLR7/8 | Resiquimod | Melanoma | gp100, MAGE-3, Resiquimod | 2 | N/A | NCT00960752 |
| 50 | TLR7/8 | Resiquimod (STM-416) | Non-muscle-invasive bladder cancer | Resiquimod | 1/2 | Not completed | NCT05710848 |
| 51 | TLR7/8 | TransCon TLR7/8 Agonist | Advanced or metastatic solid tumors | Pembrolizumab, TransCon TLR7/8 Agonist | 1/2 | Not completed | NCT04799054 |
| 52 | TLR7/8 | TransCon TLR7/8 Agonist | Advanced or metastatic solid tumors | TransCon IL-2 β/γ, Pembrolizumab, chemotherapy, TransCon TLR7/8 Agonist, surgery | 1/2 | Not completed | NCT05081609 |
| 53 | TLR7/8 | MEDI9197 | Solid tumors, CTCL | Durvalumab, MEDI9197 | 1 | Terminated (company strategy) | NCT02556463 |
| 54 | TLR7/8 | BDB001 | Advanced solid tumors | BDB001 | 2 | Not completed | NCT04819373 |
| 55 | TLR7/8 | BDB001 | Solid tumor | Atezolizumab, BDB001 | 1 | Not completed | NCT04196530 |
| 56 | TLR7/8 | BDB001 | Solid tumor | Pembrolizumab, BDB001 | 1 | Not completed | NCT03486301 |
| 57 | TLR7/8 | BDC-1001 (anti-HER2 monoclonal antibody conjugated to a TLR 7/8 dual agonist) | HER2 positive solid tumors | BDC-1001, Nivolumab | 1/2 | Not completed | NCT04278144 |
| 58 | TLR7/8 | NKTR-262 | Melanoma, Merkel cell carcinoma, triple negative breast cancer, head and neck squamous cell carcinoma, renal cell carcinoma, colorectal cancer, sarcoma | NKTR-262, bempegaldesleukin, nivolumab | 1/2 | NKTR-262 + Bempegaldesleukin + Nivolumab: Objective response rate (CR + PR) 14.3% | NCT03435640 |
| 59 | TLR7/8 | PF-07225570 | Bladder cancer | Sasanlimab, PF-07225570 | 1 | Withdrawn (company strategy) | NCT05259397 |
| 60 | TLR7, TLR8, TLR9 | IMO-8400 (antagonist of TLR7/8/9) | Waldenstrom's macroglobulinemia | IMO-8400 | 1/2 | Terminated (lack of efficacy) | NCT02092909 |
| 61 | TLR7, TLR8, TLR9 | IMO-8400 (antagonist of TLR7/8/9) | Diffuse large B cell lymphoma | IMO-8400 | 1/2 | N/A | NCT02252146 |
| 62 | TLR8 | Motolimod (VTX-2337) | Ovarian cancer | Durvalumab, pegylated liposomal doxorubicin, motolimod | 1/2 | Addition of Motolimod did not improve clinical outcomes | NCT02431559  NCT01666444 |
| 63 | TLR8 | Motolimod (VTX-2337) | Advanced, recurrent, or metastatic squamous cell cancer of the head and neck | Cetuximab, VTX-2337 | 1 | Enhanced NK cell response | NCT01334177 |
| 64 | TLR8 | Motolimod (VTX-2337) | Low-grade B-cell lymphoma | VTX-2337, radiotherapy | 1/2 | 0/2 serious adverse events | NCT01289210 |
| 65 | TLR8 | Motolimod (VTX-2337) | Solid tumor (metastatic, persistent, recurrent, spreading, progressed) | Cyclophosphamide, pegfilgrastim, motolimod | 1b | N/A | NCT02650635 |
| 66 | TLR8 | Motolimod (VTX-2337) | Advanced, recurrent, or metastatic squamous cell cancer of the head and neck | Cetuximab, motolimod | 1 | Activation of NK cell function | NCT01334177 |
| 67 | TLR8 | Motolimod (VTX-2337) | Epithelial ovarian cancer, fallopian tube cancer, primary peritoneal cancer | Motolimod, pegylated liposomal doxorubicin | 2 | Addition of motolimod did not improve clinical outcomes | NCT01666444 |
| 68 | TLR8 | Motolimod (VTX-2337) | Squamous cell carcinoma of the head and neck | Nivolumab, motolimod | 1 | Terminated (change of business strategy) | NCT03906526 |
| 69 | TLR8 | Motolimod (VTX-2337) | Ovarian epithelial cancer, fallopian tube cancer, peritoneal cavity cancer | Motolimod, pegylated liposomal doxorubicin or paclitaxel | 1 | 2/13 CR, 8/13 SD, 3/13 PD or 1/7 PR, 2/7 SD, 4/7 PD | NCT01294293 |
| 70 | TLR8 | SBT6050 | HER2 positive solid tumors | SBT6050, pembrolizumab or cemiplimab | 1 | Not completed | NCT04460456 |
| 71 | TLR8 | SBT6050 | HER2-positive cancers | SBT6050, trastuzumab deruxtecan, tucatinib, trastuzumab, capecitabine | 1/2 | 2 participants enrolled, no significant laboratory abnormalities | NCT05091528 |
| 72 | TLR8 | SBT6290 | Solid tumors with Nectin-4 expression | SBT6290, pembrolizumab | 1/2 | Withdrawn (sponsor’s decision) | NCT05234606 |
| 73 | TLR9 | CpG | Metastatic pancreatic cancer | Irreversible electroporation, Nivolumab, intratumoral CpG | 1 | Not completed | NCT04612530 |
| 74 | TLR9 | CpG | Metastatic colorectal cancer | Autologous tumor cell, CpG vaccine, autologous hematopoietic and immune cell rescue (transplantation) | 1 | Withdrawn (reason(s) unknown) | NCT00780988 |
| 75 | TLR9 | CpG-7909 | Esophageal cancer | URLC10-177, TTK-567, CpG-7909 | 1/2 | 0/9 CR, 0/9 PR, 5/9 SD, median survival time 3.7 months | NCT00669292 |
| 76 | TLR9 | CPG 7909 | Mycosis fungoides | CPG 7909 | 1/2 | Single injection: 2/6 PR, 3/6 SD, 1/6 PD;  Dual injection: 3/8 PR, 3/8 SD, 2/8 PD | NCT00226993 |
| 77 | TLR9 | CPG 7909 | Recurrent low-grade B-cell lymphoma, Mycosis Fungoides | CPG 7909, radiotherapy | 1/2 | Recurrent low-grade B-cell lymphoma: 4/15 CR+PR; Mycosis Fungoides: 5/14 CR+PR | NCT00185965 |
| 78 | TLR9 | MGN1703 | Advanced Cancers, Melanoma | Ipilimumab, MGN1703 | 1 | Not completed | NCT02668770 |
| 79 | TLR9 | IMO-2055 | Colorectal Cancer | FOLFIRI, Cetuximab, IMO-2055 | 1 | 2/14 PR, 12/14 SD, 1/14 PD | NCT00719199 |
| 80 | TLR9 | Vidutolimod (CMP-001) | Melanoma | Nivolumab, CMP-001 | 2 | Not completed | NCT04401995 |
| 81 | TLR9 | Vidutolimod (CMP-001) | Stage IV pancreatic cancer, other cancers except melanoma | INCAGN01949 (anti-CD40), VLP-encapsulated CMP-001 | 1/2 | Not completed | NCT04387071 |
| 82 | TLR9 | Vidutolimod (CMP-001) | Melanoma with lymph node disease | Nivolumab, CMP-001 | 2 | Not completed | NCT03618641 |
| 83 | TLR9 | Vidutolimod (CMP-001) | Metastatic prostate adenocarcinoma | Nivolumab, VLP-encapsulated Vidutolimod | 2 | Not completed | NCT05445609 |
| 84 | TLR9 | Vidutolimod (CMP-001) | Advanced cancer | Avelumab + CMP-001 + utomilumab or PF-04518600 | 1/2 | Not completed | NCT02554812 |
| 85 | TLR9 | Vidutolimod (CMP-001) | Metastatic colorectal cancer with liver metastases | Liver radiation therapy, Nivolumab, Ipilimumab, CMP-001 | 1 | Not completed | NCT03507699 |
| 86 | TLR9 | Tilsotolimod (IMO-2125) | Malignant melanoma | Tilsotolimod | 2 | Not completed | NCT04126876 |
| 87 | TLR9 | Tilsotolimod (IMO-2125) | Advanced cancer | Ipilimumab, Nivolumab, Tilsotolimod | 1 | Not completed | NCT04270864 |
| 88 | TLR9 | Tilsotolimod (IMO-2125) | Metastatic melanoma | Tilsotolimod, Ipilimumab | 3 | IMO-2125 + Ipilimumab: 1/238 CR, 20/238 PR, 61/238 SD, 89/238 PD, 67/238 Not evaluable;  Ipilimumab: 1/243 CR, 20/243 PR, 45/243 SD, 110/243 PD, 67/243 Not evaluable | NCT03445533 |
| 89 | TLR9 | EMD 1201081 | Squamous cell carcinoma of the head and neck | EMD 1201081, 5-FU, Cisplatin, Cetuximab | 1 | Terminated (potential safety concerns) | NCT01360827 |
| 90 | TLR9 | EMD 1201081 | Squamous cell carcinoma of the head and neck cancer | Cetuximab, EMD 1201081 | 2 | Addition of EMD 1201081 not improve clinical outcomes | NCT01040832 |
| 91 | TLR9 | DUK-CPG-001 | Myeloid malignancies, lymphoid malignancies | NK cell-enriched donor lymphocyte infusion, DUK-CPG-001 | 2 | Not completed | NCT02452697 |
| 92 | TLR9 | DV281 | Advanced non-small cell lung cancer | Nivolumab, DV281 | 1 | 13/26 SD, 9/26 PD, 4/26 unevaluable | NCT03326752 |
| 93 | TLR9 | GNKG168 | Acute lymphoblastic leukemia, acute myelogenous leukemia | GNKG168 | 1 | Terminated (loss of company sponsorship) | NCT01743807 |
| 94 | TLR9 | TAC-001 | Advanced or metastatic solid tumors | TAC-001 | 1/2 | Not completed | NCT05399654 |
| 95 | TLR9 | SD-101 | Metastatic or refractory pancreatic adenocarcinoma, stage IV pancreatic cancer | Nivolumab, radiation, SD-101 | 1 | Not completed | NCT04050085 |
| 96 | TLR9 | SD-101 | Low-grade B-cell non-Hodgkin lymphomas | Anti-OX40 antibody BMS 986178, radiation therapy, SD-101 | 1 | Not completed | NCT03410901 |
| 97 | TLR9 | SD-101 | Metastatic uveal melanoma in the liver | SD-101, Ipilimumab, Nivolumab, Relatlimab | 1 | Not completed | NCT04935229 |
| 98 | TLR9 | SD-101 | Hepatocellular carcinoma, intrahepatic cholangiocarcinoma | SD-101 + pembrolizumab or SD-101 + ipilimumab + nivolumab | 1/2 | Not completed | NCT05220722 |
| 99 | TLR9 | SD-101 | Prostatic neoplasms | Pembrolizumab, radiation therapy, leuprolide acetate, abiraterone acetate, prednisone, SD-101 | 2 | Not completed | NCT03007732 |
| 100 | TLR9 | SD-101 | Recurrent low-grade B-cell lymphoma | Ipilimumab, radiation therapy, SD-101 | 1/2 | 1/7 PR, 1/7 SD, 6/PD (1 initially PR, later PD) | NCT02254772 |
| 101 | TLR9 | SD-101 | Low grade follicular lymphoma, marginal zone lymphoma, mantle cell lymphoma | Ibrutinib, radiation therapy, SD-101 | 1/2 | Not completed | NCT02927964 |
| 102 | TLR9 | DUK-CPG-001 | Hodgkin lymphoma, non-Hodgkin lymphoma | LMP2A-loaded conventional DC vaccine, DUK-CPG-001 | 2 | Withdrawn (reason(s) unknown) | NCT02115126 |
| 103 | TLR9 | PF-03512676 | Mantle cell lymphoma | CpG-MCL vaccine, PF-3512676, vaccine-primed T-cells, autologous hematopoietic stem cell transplant, Rituximab, standard induction chemotherapy, cyclophosphamide, Filgrastim | 2 | 42/48, 33/48, 27/48, 19/48, 13/48 OS after 1, 2, 3, 4, 5 year; 6.9 years, Time-to-progression | NCT00490529 |
| 104 | TLR | TLR ligand (not defined) | Melanoma | TLR ligands matured autologous dendritic cell vaccination | 1/2 | N/A | NCT00940004 |
| 105 | TLR modulator | Syngenon (BSG-001) | Malignant pleural effusion, malignant ascites | BSG-001 | 1/2 | N/A | NCT03736122 |
| 106 | TLRs | Decoy20 (multiple TLR agonist-based cancer immunotherapy) | Solid tumor | Decoy20 | 1 | Not completed | NCT05651022 |

Abbreviations: CR, complete response; DFS, disease-free survival; N/A, not available; NR, no response; OS, overall survival; PD, progressive disease; PFS, progression-free survival; PR, partial response; SAE, serious adverse events; SD, stable disease

NOTE: The words “**toll-like receptor AND Cancer”,** and “**TLR AND Cancer”** were used for the search at <https://clinicaltrials.gov/>. Seventy four and 78 relevant trials were found respectively. From this list, only trials that used TLR agonists/antagonists for cancer treatment were selected.

**Appendix Table 2** The pro- and anti-cancer effects of TLR agonists

| TLR | Pro-cancer agonist | Pro-cancer effect | Reference | Anti-cancer agonist | Anti-cancer effect | Reference |
| --- | --- | --- | --- | --- | --- | --- |
| TLR2/TLR1 | Pam3CSK4 | TLR2/TLR1 agonist induced proliferation of human lung adenocarcinoma cell. | [[44](#_ENREF_44)] | CADI-05 | TLR2 ligand CADI-05 in combination with taxane and platinum chemotherapy improved median survival in squamous lung cancer patients. | [[113](#_ENREF_113)] |
|  |  |  |  | Diprovocim | TLR2/TLR1 agonist Diprovocim promoted specific humoral and CTL responses, inhibited tumor growth. | [[115](#_ENREF_115)] |
| TLR3 | Poly (I:C) | TLR3 agonist promoted invasiveness of metastatic cancerous intestinal epithelial cells. | [[49](#_ENREF_49)] | Poly (ICLC) | In situ vaccine containing poly (ICLC) induced partial or complete regression and abscopal effect in patients with indolent non-Hodgkin’s lymphoma. | [[30](#_ENREF_30)] |
|  | Poly (I:C) | TLR3 agonist enhanced breast cancer cell proliferation and induced transformation of cancer stem cell. | [[50](#_ENREF_50), [51](#_ENREF_51)] | Anthracyclines | Anthracyclines activates TLR3 and induces type I IFN. | [[119](#_ENREF_119)] |
|  | Poly (I:C) | TLR3 agonist induced migration of head and neck cancer cell. | [[53](#_ENREF_53)] | Poly (I:C) | TLR3 signaling induced cancer cell apoptosis and DCs activation in lung adenocarcinoma. | [[120](#_ENREF_120)] |
| TLR4 | LPS | TLR4 signaling induced colonic carcinogenesis. | [[57](#_ENREF_57)] | Paclitaxel | Paclitaxel-induced TLR4 signaling promoted the release of DAMPs and induced immunogenic cell death. | [[124](#_ENREF_124)] |
|  |  | Blockade of TLR4 signaling suppressed cell invasion, EMT-related genes expression, and increased chemosentivity in breast and ovarian cancer. | [[58](#_ENREF_58), [59](#_ENREF_59)] | Mutant form of LPS | TLR4 activation in TP53 wild-type breast cancer cells inhibited cancer cell growth. | [[125](#_ENREF_125)] |
| TLR5 | Flagellin | TLR5-dependent commensal bacteria promoted cancer progression. | [[60](#_ENREF_60)] | Flagellin | A constructed antibody genetically fusing flagellin increased CD8+ T cell activation. | [[126](#_ENREF_126)] |
|  | Flagellin | Activation of TLR5 in gastric cancer cells induced enhanced cell proliferation. | [[61](#_ENREF_61)] | Flagellin derivative | The flagellin derivative and human TLR5 employed in an adenovirus vector suppressed tumor growth and metastasis. | [[127](#_ENREF_127)] |
|  |  |  |  | Flagellin | Activation of TLR5 by flagellin injection peritumorally induced colon cancer necrosis and regression. | [[128](#_ENREF_128)] |
|  |  |  |  | Flagellin-related peptides | Vaccination of mice with liposomes bearing antigen and flagellin-related peptides induced potent suppression of tumor growth and metastasis. | [[129](#_ENREF_129)] |
| TLR7 | ssRNA40 | TLR7 ligation promoted pancreatic tumorigenesis and accelerated tumor progression. | [[63](#_ENREF_63)] | Imiquimod | 5% imiquimod cream treatment resulted in partial response or stable disease in breast cancer patients with skin metastases. | [[134](#_ENREF_134)] |
|  | Loxoribine | Stimulation of lung cancer cell with TLR7 ligand increased cellular survival, tumor progression and chemoresistance. | [[65](#_ENREF_65), [66](#_ENREF_66)] | Imiquimod | Topical imiquimod and radiotherapy resulted in complete tumor regression in 4/6 mice. | [[135](#_ENREF_135)] |
|  | Gardiquimod | TLR7 agonist promoted HepG2 cells proliferation and migration. | [[67](#_ENREF_67)] | Resiquimod | Resiquimod can inhibit breast cancer cell proliferation, reprogram MDSC towards M1 macrophages, reverse chemoresistance. | [[34](#_ENREF_34), [136](#_ENREF_136)] |
| TLR8 | miR-21, miR-29a | These microRNAs engage TLR8 to induce prometastatic inflammation and oncogenesis. | [[69](#_ENREF_69)] | Poly-G  oligonucleotides,ssRNA40, ssRNA33,  motolimod | These synthetic or natural TLR8 agonists induced TLR8 signaling reversed Treg cell function and enhanced CD8+ T cell mediated tumor regression. | [[139](#_ENREF_139), [142](#_ENREF_142)] |
|  | miR-21 | miR-21 caused NF-κB-mediated inflammatory signaling and promoted EMT induction and cellular invasion. | [[70](#_ENREF_70)] | Motolimod | A motolimod-containing combination therapy was effective in selected subgroup cancer patients or those with specific biomarkers. | [[140](#_ENREF_140), [141](#_ENREF_141)] |
|  | Poly U | Stimulation of lung cancer cell with poly U increased cellular survival and tumor progression. | [[65](#_ENREF_65)] |  |  |  |
|  | Resiquimod | Resiquimod induced pancreatic cancer cell proliferation, promoted tumor growth and chemoresistance. | [[64](#_ENREF_64)] |  |  |  |
| TLR9 | Nuclease-resistant DNA fragments | Self-derived DNA fragments induced TLR9-mediated breast cancer cell invasion. | [[75](#_ENREF_75)] | Lefitolimod | Maintenance treatment of cancer patients with lefitolimod after chemotherapy improved OS or PFS in some patients. | [[146](#_ENREF_146), [147](#_ENREF_147)] |
|  | mtDNA | MtDNA activated TLR9 to promote HCC progression. | [[76](#_ENREF_76), [77](#_ENREF_77)] | SD-101 | Intratumoral SD-101 combined PD-1 antibody or radiotherapy improved therapeutic efficacy in melanoma or indolent lymphoma. | [[149](#_ENREF_149), [150](#_ENREF_150)] |
|  | ODN1585 | TLR9 activation upregulated PD-L1 expression in HCC cells which resulted in immunosuppression. | [[78](#_ENREF_78)] | EMD 1201081, PF-3512676 | EMD 1201081 or PF-3512676 combined chemotherapy did not show clinical efficacy in late-stage HNSCC or NSCLC patients. | [[151-153](#_ENREF_151)] |

Abbreviations: CTL, cytotoxic lymphocyte; DAMPs, damage-associated molecular patterns ; DCs, dendritic cells; HCC, hepatocellular carcinoma; HNSCC, head and neck squamous cell carcinoma; IFN, interferon; LPS, lipopolysaccharide; MDSC, myeloid-derived suppressor cell; MtDNA, mitochondrial DNA; NSCLC, non-small cell lung cancer; OS, overall survival; PFS, progression-free survival.
